# Supplementary material for: An Integrative CGH, MSI and Candidate Genes Methylation Analysis of Colorectal Tumors
Source: PLoS One. 2014 Jan 27;9(1):e82185. doi: 10.1371/journal.pone.0082185 (PMC3903472; doi:10.1371/journal.pone.0082185)
Supplement: Table S2 — (XLSX) [file pone.0082185.s002.xlsx]

## Sheet: Data
Supplemental Table 2: Methylation results for all 15 genes in the analyzed samples
No	Aberr#	MSI	P16	hMLH1	SYNE1	RNF182	MMP2	ICAM5	CHD5	CD109	GPN2B	EVL	RET	STARD8	LGR6	PTPRD	APC2	#Non Meth. Genes/out of 15
12T	139	0	0	0	1	0	1	0	1	0	1	1	1	0	0	1	0	8
16T	17	0	0	0	1	0	1	0	1	0	0	0	0	1	0	1	0	10
18T	57	0	1	1	1	0	1	0	1	0	1	0	1	0	1	1	1	5
22T	374	0	0	0	1	0	1	0	0	0	1	0	1	0	1	0	1	9
25T	147	0	0	0	1	0	1	0	0	1	1	1	1	0	0	1	1	7
28T	18	0	0	0	1	0	1	0	1	0	0	1	0	0	0	1	1	9
29T	55	1	0	0	1	0	1	0	1	0	1	1	0	1	0	1	1	7
3T	462	0	0	0	1	0	1	0	0	1	1	1	0	0	0	1	1	8
31T	10	1	1	1	1	0	1	0	1	0	0	1	0	0	1	1	1	6
32T	7	1	1	1	1	0	1	0	1	0	0	1	0	0	1	0	1	7
35T	154	0	0	0	1	0	1	0	1	1	1	0	0	1	1	1	1	6
36T	43	0	0	0	1	0	1	0	1	0	0	1	0	1	1	0	1	8
38T	244	0	0	0	1	0	1	0	0	1	1	0	0	1	1	1	1	7
4T	6	1	1	1	1	0	1	0	1	0	1	1	1	1	1	1	1	3
40T	66	0	0	0	1	0	1	0	0	0	1	1	0	1	1	1	1	7
42T	31	0	0	0	1	0	1	0	0	0	1	1	0	1	0	1	0	9
44T	827	0	0	0	1	0	1	0	0	0	1	1	0	1	0	1	1	8
46T	13	1	0	1	1	0	1	1	0	1	1	1	0	1	0	1	1	5
47T	12	0	0	0	1	0	1	0	0	0	1	1	0	1	0	1	1	8
49T	37	0	0	0	1	0	1	0	0	0	1	1	0	1	0	1	1	8
53T	9	0	0	0	1	0	1	0	0	1	1	1	1	0	0	0	1	8
58T	30	0	0	0	1	0	1	0	1	0	1	1	0	1	0	1	1	7
71T	67	0	0	0	1	0	1	0	0	0	1	1	1	0	0	1	1	7
72T	91	0	0	0	1	0	1	0	0	1	1	1	1	0	0	1	1	7
77T	5	0	0	0	1	0	1	0	0	0	1	1	0	1	0	0	1	9
8T	13	0	0	0	1	0	1	1	1	1	1	1	1	1	0	1	1	4
9T	1	0	0	0	1	0	1	0	0	0	1	1	1	1	0	1	1	7
		1= MSI-H						1= methylated
								0=Ubmethylated
