# Supplementary material for: An Integrative CGH, MSI and Candidate Genes Methylation Analysis of Colorectal Tumors
Source: PLoS One. 2014 Jan 27;9(1):e82185. doi: 10.1371/journal.pone.0082185 (PMC3903472; doi:10.1371/journal.pone.0082185)
Supplement: Table S5 — (XLSX) [file pone.0082185.s005.xlsx]

## Sheet: Sheet1
Supplemental Table: Aberrations defining the cladogram nodes
Node		% of All Aberrations
2-->6	percent on chromosome 7	0.477415
	percent on chromosome X	0.52133
2-->3	chr1	0.102866
	chr2	0.0618298
	chr3	0.0534623
	chr4	0.0364766
	chr5	0.0438421
	chr6	0.0537128
	chr7	0.0456459
	chr8	0.0334703
	chr9	0.0408859
	chr10	0.0377793
	chr11	0.0646858
	chr12	0.0515082
	chr13	0.0168354
	chr14	0.0322678
	chr15	0.0339212
	chr16	0.0406854
	chr17	0.058573
	chr18	0.0139293
	chr19	0.0676922
	chr20	0.0280589
	chr21	0.012376
	chr22	0.022848
	chrX	0.0416875
	chrY	0.00486021
3-->18	chr1	1
13-->25	chr1	0.0479855
	chr7	0.00316885
	chr8	0.00316885
	chr9	0.00271616
	chr10	0.00407424
	chr11	0.00633771
	chr12	0
	chr13	0.150747
	chr14	0.234495
	chr17	0.202807
	chr18	0.0946129
	chr20	0.136713
	chr22	0.113173
15-->4	chr1	0.0909091
	chr11	0.0839161
	chr12	0.215229
	chr16	0.0761461
	chr17	0.425796
	chr19	0.107226
3-->13	chr1	0.102531
	chr2	0.0618622
	chr3	0.0531299
	chr4	0.0369407
	chr5	0.0437108
	chr6	0.0530808
	chr7	0.0465071
	chr8	0.0338991
	chr9	0.040522
	chr10	0.037971
	chr11	0.0638736
	chr12	0.0511185
	chr13	0.0165816
	chr14	0.032133
	chr15	0.0339482
	chr16	0.0412088
	chr17	0.0578885
	chr18	0.0137853
	chr19	0.0697606
	chr20	0.0282084
	chr21	0.0123136
	chr22	0.022763
	chrX	0.0413069
	chrY	0.00475863
13-->15	chr1	0.00780696
	chr11	0.116395
	chr16	0.0844571
	chr17	0.012775
	chr19	0.777857
